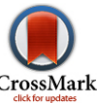

## Correction

# Correction: Posttraumatic Stress Disorder Increases Sensitivity to Long Term Losses among Patients with Major Depressive Disorder

The *PLOS ONE* Staff

## Notice of Republication

This article was republished on March 13 2014, to include the supplementary information (Figure S1, Table S1-S6) that were corrupt in the original version. Please download this article again to view the correct version. The originally published, uncorrected article and the republished, corrected article are provided here for reference.

## Supporting Information

### File S1.

Originally published, uncorrected article.

### File S2.

Republished corrected article.

## Reference

1. Engelmann JB, Maciuba B, Vaughan C, Paulus MP, Dunlop BW (2013) Posttraumatic Stress Disorder Increases Sensitivity to Long Term Losses among Patients with Major Depressive Disorder. *PLoS ONE* 8(10): e78292. doi:10.1371/journal.pone.0078292

**Citation:** The *PLOS ONE* Staff (2014) Correction: Posttraumatic Stress Disorder Increases Sensitivity to Long Term Losses among Patients with Major Depressive Disorder. *PLoS ONE* 9(4): e95819. doi:10.1371/journal.pone.0095819

**Published:** April 16, 2014

**Copyright:** © 2014 The *PLOS ONE* Staff. This is an open-access article distributed under the terms of the Creative Commons Attribution License, which permits unrestricted use, distribution, and reproduction in any medium, provided the original author and source are credited.
